# Supplementary material for: Thromboembolic events in left ventricular non-compaction: comparison between children and adults – a systematic review and meta-analysis
Source: HighWire-hosted journal article supplement (doi:10.1136/openhrt-2021-001908), 2022-05-01
Supplement: openhrt-2021-001908supp001_data_supplement.pdf [file openhrt-2021-001908supp001_data_supplement.pdf]

## Supplementary material

**Supplemental Table 2.** Search strategies

**Supplemental Table 3.** Risk of bias table

**Supplemental Table 4.** Characteristics of included studies

**Supplemental Table 5.** Result of multiple linear regression analysis coefficients for logarithmic-transformed prevalence of thromboembolism

**Supplemental Table 6.** Comparison of clinical characteristics between patients with and without TE

**Supplemental Table 7.** Comparison of clinical characteristics between adult patients with and without TE

**Supplemental Figure 1.** Summaries of forest plots of the mean prevalence of arrhythmia and LVEF in patients with LVNC

**Supplemental Figure 2.** Funnel plot of the assessment of publication bias

**Supplemental Figure 3.** Forest plot of the mean prevalence of thromboembolism in the patients with LVNC according to subgroup analysis

**Supplemental Figure 4.** Forest plot of the mean incidence of thromboembolism in the patients with LVNC according to subgroup analysis

**Supplemental Figure 5.** Forest plot of the mean prevalence and incidence of thromboembolism in the patients with LVNC excluding studies in which antithrombotic treatment in more than 30% of patient's population

**Supplemental Figure 6.** Forest plot of the mean mortality rates in the patients with LVNC according to subgroup analysis

**Supplemental Figure 7.** Forest plot of the mean mortality and heart plantation rates in the patients with LVNC according to subgroup analysis

### References.

#### Supplemental Table 2. Search strategies

Search strategies using MEDLINE (Supplemental Table 1a), Embase (Supplemental Table 1b), and Cochrane Cochrane Central Register of Controlled Trial (Supplemental Table 1c) are shown below.

#### Supplemental Table 2a. Search strategy using MEDLINE

| No. | Query                                                                                                                                                                                                                                                                                                                                    | Hit retrieved |
|-----|------------------------------------------------------------------------------------------------------------------------------------------------------------------------------------------------------------------------------------------------------------------------------------------------------------------------------------------|---------------|
| S5  | ((('isolated noncompaction of the ventricular myocardium'/exp) OR hypertrabeculation OR LVNC OR (left ventricular trabeculation) OR (left ventricular noncompaction) OR (left ventricular non-compaction) OR (noncompacted cardiomyopathy) OR (noncompacted myocardium) OR (noncompaction cardiomyopathy) OR (noncompaction myocardium)) | 6,800         |
| S6  | ((non-compacted cardiomyopathy) OR (non-compacted myocardium) OR (non-compaction cardiomyopathy) OR (non-compaction myocardium) OR (noncompaction of left ventricular myocardium) OR (spongy myocardium))                                                                                                                                | 2,770         |
| S8  | (warfarin OR anticoagulants OR aspirin OR apixaban OR edoxaban OR rivaroxaban OR (antithrombotic therapy) OR dabigatran)                                                                                                                                                                                                                 | 433,156       |
| S9  | (thromboembolism OR thrombosis OR embolism)                                                                                                                                                                                                                                                                                              | 1,034,463     |
| S10 | S6 OR S5                                                                                                                                                                                                                                                                                                                                 | 7227          |

|     |                                        |     |
|-----|----------------------------------------|-----|
| S11 | S10 AND S8                             | 219 |
| S12 | S10 AND S9                             | 738 |
| S13 | S12 OR S11                             | 833 |
| S14 | (S12 OR S11) and (subt.exact("human")) | 744 |

Supplemental Table 2b. Search strategy using Embase

| No. | Query                                                                                                                                                                                                                                                                                                                                                      | Hit retrieved |
|-----|------------------------------------------------------------------------------------------------------------------------------------------------------------------------------------------------------------------------------------------------------------------------------------------------------------------------------------------------------------|---------------|
| S1  | ((('isolated noncompaction of the ventricular myocardium'/exp) OR hypertrabeculation OR LVNC OR (left ventricular trabeculation) OR (left ventricular noncompaction) OR (left ventricular non-compaction) OR (noncompacted cardiomyopathy) OR (noncompacted myocardium) OR (noncompaction cardiomyopathy) OR (noncompaction myocardium)) and (human(yes))) | 3,754         |
| S3  | ((non-compacted cardiomyopathy) OR (non-compacted myocardium) OR (non-compaction cardiomyopathy) OR (non-compaction myocardium) OR (noncompaction of left ventricular myocardium) OR (spongy myocardium)) and (human(yes))                                                                                                                                 | 1,842         |
| S4  | ('warfarin'/exp OR 'anticoagulants'/exp OR 'aspirin'/exp OR apixaban OR edoxaban OR rivaroxaban OR (antithrombotic therapy) OR 'dabigatran'/exp) and (human(yes))                                                                                                                                                                                          | 36,963        |
| S5  | (warfarin OR anticoagulants OR aspirin OR apixaban OR edoxaban OR rivaroxaban OR (antithrombotic therapy) OR dabigatran) and (human(yes))                                                                                                                                                                                                                  | 208,200       |
| S6  | ('thromboembolism'/exp OR 'thrombosis'/exp OR 'embolism'/exp) and (human(yes))                                                                                                                                                                                                                                                                             | 1             |
| S7  | (thromboembolism OR thrombosis OR embolism) and (human(yes))                                                                                                                                                                                                                                                                                               | 509,254       |
| S8  | S3 OR S1                                                                                                                                                                                                                                                                                                                                                   | 3,889         |
| S9  | S8 AND S5                                                                                                                                                                                                                                                                                                                                                  | 184           |
| S10 | S8 AND S7                                                                                                                                                                                                                                                                                                                                                  | 650           |
| S11 | S10 OR S9                                                                                                                                                                                                                                                                                                                                                  | 731           |
| S15 | (S10 OR S9) and (rtype.exact("Article") AND subt.exact("human"))                                                                                                                                                                                                                                                                                           | 339           |

Supplemental Table 2c. Search strategy using Cochrane Central Register of Controlled Trial

| No. | Query                                                                                        | Hit retrieved |
|-----|----------------------------------------------------------------------------------------------|---------------|
| #1  | MeSH descriptor: [Isolated Noncompaction of the Ventricular Myocardium]<br>explode all trees | 0             |
| #2  | hypertrabeculation                                                                           | 0             |
| #3  | LVNC                                                                                         | 1             |
| #4  | left ventricular trabeculation                                                               | 3             |
| #5  | left ventricular noncompaction                                                               | 6             |
| #6  | left ventricular non-compaction                                                              | 5             |
| #7  | noncompacted cardiomyopathy                                                                  | 2             |
| #8  | noncompacted myocardium                                                                      | 1             |
| #9  | noncompaction cardiomyopathy                                                                 | 7             |
| #10 | noncompaction myocardium                                                                     | 4             |

|     |                                                                                                            |         |
|-----|------------------------------------------------------------------------------------------------------------|---------|
| #11 | non-compacted cardiomyopathy                                                                               | 2       |
| #12 | non-compacted myocardium                                                                                   | 1       |
| #13 | non-compaction cardiomyopathy                                                                              | 6       |
| #14 | non-compaction myocardium                                                                                  | 4       |
| #15 | noncompaction of left ventricular myocardium                                                               | 4       |
| #16 | spongy myocardium                                                                                          | 0       |
| #17 | #1 OR #2 OR #3 OR #4 OR #5 OR #6 OR #7 OR #7 OR #8 OR #9 OR #10 OR #11<br>OR #12 OR #13 OR #14 OR 15 OR 16 | 448,627 |
| #18 | MeSH descriptor: [Warfarin] explode all trees                                                              | 1,700   |
| #19 | MeSH descriptor: [Anticoagulants] explode all trees                                                        | 4,663   |
| #20 | MeSH descriptor: [Aspirin] explode all trees                                                               | 5,935   |
| #21 | apixaban                                                                                                   | 978     |
| #22 | MeSH descriptor: [Dabigatran] explode all trees                                                            | 312     |
| #23 | edoxaban                                                                                                   | 594     |
| #24 | rivaroxaban                                                                                                | 1,738   |
| #25 | antithrombotic therapy                                                                                     | 2,119   |
| #26 | #18 OR #19 OR #20 OR #21 OR #22 OR #23 OR #24 OR #25                                                       | 14,025  |
| #27 | MeSH descriptor: [Thromboembolism] explode all trees                                                       | 2,112   |
| #28 | MeSH descriptor: [Thrombosis] explode all trees                                                            | 4,841   |
| #29 | MeSH descriptor: [Embolism] explode all trees                                                              | 1,427   |
| #30 | #27 OR #28 OR #29                                                                                          | 7,272   |
| #31 | #17 AND #26                                                                                                | 1       |
| #32 | #17 AND #30                                                                                                | 0       |
| #33 | #31 OR #32                                                                                                 | 1       |

**Supplemental Table 3. Risk of bias table**

|                       |      | Random sequence generation (selection bias) | Allocation sequence concealment (selection bias) | Blinding of participants and personnel (performance bias) | Blinding of outcome assessment (detection bias) | Incomplete outcome data (attrition bias) | Selective outcome reporting (reporting bias) | Other bias |
|-----------------------|------|---------------------------------------------|--------------------------------------------------|-----------------------------------------------------------|-------------------------------------------------|------------------------------------------|----------------------------------------------|------------|
| Chin TK               | 1990 | ?                                           | ?                                                | +                                                         | +                                               | ?                                        | ?                                            | +          |
| Ichida F              | 1999 | ?                                           | ?                                                | +                                                         | +                                               | +                                        | +                                            | +          |
| Wald R                | 2004 | ?                                           | ?                                                | +                                                         | +                                               | +                                        | +                                            | +          |
| Lilje C               | 2006 | ?                                           | ?                                                | +                                                         | +                                               | +                                        | +                                            | +          |
| Koh C                 | 2009 | ?                                           | ?                                                | +                                                         | +                                               | +                                        | +                                            | +          |
| Wang C                | 2017 | ?                                           | ?                                                | +                                                         | +                                               | +                                        | +                                            | +          |
| Nucifora G            | 2017 | ?                                           | ?                                                | +                                                         | +                                               | ?                                        | ?                                            | +          |
| van Waning J          | 2018 | ?                                           | ?                                                | +                                                         | +                                               | +                                        | +                                            | +          |
| Takasaki A            | 2018 | ?                                           | ?                                                | +                                                         | +                                               | +                                        | ?                                            | +          |
| Hirono K              | 2020 | ?                                           | ?                                                | +                                                         | +                                               | +                                        | ?                                            | +          |
| Ritter M              | 1997 | ?                                           | ?                                                | +                                                         | +                                               | +                                        | ?                                            | +          |
| Oechslin EN           | 2000 | ?                                           | ?                                                | +                                                         | +                                               | +                                        | +                                            | +          |
| Stollberger C         | 2005 | +                                           | +                                                | +                                                         | +                                               | ?                                        | +                                            | +          |
| Murphy RT             | 2005 | ?                                           | ?                                                | +                                                         | +                                               | +                                        | +                                            | +          |
| Lofiego C             | 2007 | ?                                           | ?                                                | +                                                         | +                                               | +                                        | +                                            | +          |
| Espinola-Zavaleta N   | 2006 | ?                                           | ?                                                | +                                                         | +                                               | +                                        | +                                            | +          |
| Aras D                | 2006 | ?                                           | ?                                                | +                                                         | +                                               | +                                        | +                                            | +          |
| Finsterer J           | 2008 | ?                                           | ?                                                | +                                                         | +                                               | +                                        | +                                            | +          |
| Fazio G               | 2008 | ?                                           | ?                                                | +                                                         | +                                               | +                                        | +                                            | +          |
| Yousef ZR             | 2009 | ?                                           | ?                                                | +                                                         | +                                               | ?                                        | ?                                            | +          |
| Stanton C             | 2009 | ?                                           | ?                                                | +                                                         | +                                               | +                                        | +                                            | +          |
| Shoji M               | 2010 | ?                                           | ?                                                | +                                                         | +                                               | ?                                        | ?                                            | +          |
| Habib G               | 2011 | ?                                           | ?                                                | +                                                         | +                                               | +                                        | +                                            | +          |
| Greutmann M           | 2012 | ?                                           | ?                                                | +                                                         | +                                               | +                                        | +                                            | +          |
| Yun H                 | 2011 | ?                                           | ?                                                | +                                                         | +                                               | ?                                        | ?                                            | +          |
| Stollberger C         | 2013 | ?                                           | ?                                                | +                                                         | +                                               | +                                        | ?                                            | +          |
| Nikolić A             | 2012 | ?                                           | ?                                                | +                                                         | +                                               | ?                                        | ?                                            | +          |
| Caliskan K            | 2012 | ?                                           | ?                                                | +                                                         | +                                               | +                                        | ?                                            | +          |
| Stacey R              | 2013 | ?                                           | ?                                                | +                                                         | +                                               | ?                                        | ?                                            | +          |
| Tian T                | 2014 | ?                                           | ?                                                | +                                                         | +                                               | +                                        | +                                            | +          |
| Peters F              | 2014 | +                                           | +                                                | +                                                         | +                                               | +                                        | +                                            | +          |
| Li J                  | 2015 | ?                                           | ?                                                | +                                                         | +                                               | +                                        | +                                            | +          |
| Akhour S              | 2015 | ?                                           | ?                                                | +                                                         | +                                               | ?                                        | ?                                            | +          |
| Stollberger C         | 2015 | ?                                           | ?                                                | +                                                         | +                                               | +                                        | +                                            | +          |
| Amzulescu MS          | 2015 | ?                                           | ?                                                | +                                                         | +                                               | +                                        | +                                            | +          |
| Minamisawa M          | 2016 | ?                                           | ?                                                | +                                                         | +                                               | ?                                        | ?                                            | +          |
| Zhou H                | 2016 | ?                                           | ?                                                | +                                                         | +                                               | ?                                        | ?                                            | +          |
| Andreini D            | 2016 | ?                                           | ?                                                | +                                                         | +                                               | +                                        | +                                            | +          |
| Muser D               | 2017 | ?                                           | ?                                                | +                                                         | +                                               | +                                        | +                                            | +          |
| Asfalou I             | 2017 | ?                                           | ?                                                | +                                                         | +                                               | +                                        | +                                            | +          |
| Tavares de Melo MD    | 2017 | ?                                           | ?                                                | +                                                         | +                                               | ?                                        | ?                                            | +          |
| Mazurkiewicz L        | 2017 | ?                                           | ?                                                | +                                                         | +                                               | +                                        | +                                            | +          |
| Nucifora G            | 2017 | ?                                           | ?                                                | +                                                         | +                                               | ?                                        | ?                                            | +          |
| Sedaghat-Hamedani F   | 2017 | ?                                           | ?                                                | +                                                         | +                                               | +                                        | +                                            | +          |
| Salazar-Mendiguchía J | 2019 | ?                                           | ?                                                | +                                                         | +                                               | +                                        | +                                            | +          |
| Martinez H            | 2017 | ?                                           | ?                                                | +                                                         | +                                               | ?                                        | ?                                            | +          |
| van Waning J          | 2018 | ?                                           | ?                                                | +                                                         | +                                               | +                                        | +                                            | +          |
| Araujo-Filho JAB      | 2018 | ?                                           | ?                                                | +                                                         | +                                               | ?                                        | ?                                            | +          |
| Sohns C               | 2019 | ?                                           | ?                                                | +                                                         | +                                               | ?                                        | ?                                            | +          |
| van Waning JI         | 2019 | ?                                           | ?                                                | +                                                         | +                                               | +                                        | +                                            | +          |
| Azevedo O             | 2019 | ?                                           | ?                                                | +                                                         | +                                               | +                                        | +                                            | +          |
| Macaione F            | 2020 | ?                                           | ?                                                | +                                                         | +                                               | ?                                        | ?                                            | +          |
| Asmakutlu O           | 2020 | ?                                           | ?                                                | +                                                         | +                                               | ?                                        | ?                                            | +          |
| Rocon C               | 2020 | ?                                           | ?                                                | +                                                         | +                                               | +                                        | +                                            | +          |
| Rapatz K              | 2020 | ?                                           | ?                                                | +                                                         | +                                               | +                                        | +                                            | +          |
| Zemrak F              | 2020 | ?                                           | ?                                                | +                                                         | +                                               | ?                                        | ?                                            | +          |
| Femia G               | 2020 | ?                                           | ?                                                | +                                                         | +                                               | +                                        | +                                            | +          |
| Galizio N             | 2011 | ?                                           | ?                                                | +                                                         | +                                               | +                                        | +                                            | +          |
| Pignatelli R          | 2003 | ?                                           | ?                                                | +                                                         | +                                               | +                                        | +                                            | +          |

According to the Cochrane Hand book for Systematic Reviews of Interventions, version 5.1.0. +: low risk of bias; - : high risk of bias; ?: unclear risk of bias.

**Supplemental Table 4. Characteristics of included studies**

| Author                | Year | Patients (n) | Age (years)      | Male (%) | Follow-up period (years) | Diagnostic criteria | Echo/MRI | LVEF (%)         | AF (%) | VT (%) | Anticoagulant | Antiplatelet | Anticoagulant/Antiplatelet (%) | Hx of TE (%) | TE events (%) |
|-----------------------|------|--------------|------------------|----------|--------------------------|---------------------|----------|------------------|--------|--------|---------------|--------------|--------------------------------|--------------|---------------|
| <b>Children</b>       |      |              |                  |          |                          |                     |          |                  |        |        |               |              |                                |              |               |
| Chin[1]               | 1990 | 8            | 8.9 (0.9–22.5)   | 63.0     | N/A                      | Chin                | Echo     | N/A              | 0      | 62.5   | N/A           | N/A          | N/A                            | 38.0         | N/A           |
| Ichida[2]             | 1999 | 27           | 5.0 (0–15.0)     | 55.6     | 6.0 (0–17.0)             | Ichida              | Echo     | 61.5 ± 11.6      | 3.7    | 0      | N/A           | N/A          | N/A                            | N/A          | 0             |
| Pignatelli[3]         | 2003 | 36           | 0.3 (0–17)       | 55.6     | 3.2 (0.5– 12.0)          | Jenni               | Echo     | 25 (18.0–32.0)   | 0      | 2.8    | N/A           | N/A          | N/A                            | 2.8          | 0             |
| Wald[4]               | 2004 | 22           | 3.9 (0–16.0)     | 40.9     | 3.0 (0.1–16)             | Jenni               | Echo     | 34.0 (6.0–67)    | 0      | 9.1    | N/A           | N/A          | N/A                            | N/A          | 0             |
| Lilje[5]              | 2006 | 66           | 4.0 (0–21.0)     | 48.5     | 1.0 (0–4.3)              | Chin, Jenni         | Echo     | N/A              | N/A    | N/A    | N/A           | N/A          | N/A                            | N/A          | 13.9          |
| Koh[6]                | 2009 | 10           | 2.0 (0–12.0)     | 70.0     | 2.0 (0.2–3.0)            | Jenni               | Echo     | N/A              | N/A    | N/A    | N/A           | N/A          | N/A                            | N/A          | 0             |
| Wang[7]               | 2017 | 205          | 3.6 (0–15.0)     | 53.7     | 4.6 (0–22.0)             | Jenni               | Echo     | 49.9 ± 2.1       | N/A    | N/A    | N/A           | N/A          | N/A                            | N/A          | 4.9           |
| Nucifora[8]           | 2017 | 12           | 15.0 ± 3.0       | 75.0     | N/A                      | Petersen, Jacquire  | MRI      | 64.0 ± 8.0       | N/A    | 8.0    | N/A           | N/A          | N/A                            | 0            | N/A           |
| van Waning[9]         | 2018 | 52           | 7.0 (0–14.0)     | 52.0     | 5.0 (1.5–9.4)            | Jenni, Petersen     | UCG/MRI  | N/A              | 10.0   | 6.0    | N/A           | N/A          | N/A                            | 2.0          | 4.0           |
| Takasaki[10]          | 2018 | 82           | 0.8 (0–35.0)     | 56.1     | 4.8 (0–22.0)             | Paterick            | Echo     | 42.4 ± 3.5       | N/A    | N/A    | N/A           | N/A          | N/A                            | 3.7          | N/A           |
| Hirono[11]            | 2020 | 206          | 0.3 (0–16.0)     | 57.8     | 2.0 (0–33.0)             | Paterick            | Echo     | 47.1 ± 19.1      | 0      | 11.2   | N/A           | N/A          | N/A                            | 2.4          | N/A           |
| <b>Adults</b>         |      |              |                  |          |                          |                     |          |                  |        |        |               |              |                                |              |               |
| Ritter[12]            | 1997 | 17           | 41.6 (18.0–71.0) | 82.3     | 2.5 ± 2.3                | Stollberger         | Echo     | N/A              | 29.4   | 11.8   | N/A           | N/A          | N/A                            | 5.9          | 24.0          |
| Oechslin[13]          | 2000 | 34           | 42.0 ± 17.0      | 74.0     | 3.7 ± 3.3                | Jenni               | Echo     | 33.0 ± 13.0      | 26.0   | 41.0   | N/A           | N/A          | N/A                            | N/A          | 24.0          |
| Stollberger[14]       | 2005 | 62           | 53.0             | 86.0     | N/A                      | Stollberger         | Echo     | FS 25.1          | 8.1    | N/A    | yes           | N/A          | 6.5                            | 1.6          | 10.0          |
| Murphy[15]            | 2005 | 45           | 37.0 ± 17.0      | 62.2     | 2.7 (0.5–14.9)           | Chin, Jenni         | Echo     | FS 21.0 ± 9.0    | 6.5    | 22.0   | yes           | N/A          | 60.0                           | N/A          | 4.0           |
| Lofiego[16]           | 2007 | 65           | 42.0 ± 17.0      | N/A      | 3.8 (0.5–16.1)           | Jenni               | Echo     | 31.0 ± 11.0      | 1.5    | 6.0    | yes           | N/A          | 52.3                           | N/A          | 5.0           |
| Espinola-Zavaleta[17] | 2006 | 53           | 43.2 ± 14.8      | 47.2     | 0.6 ± 0.4                | Jenni               | Echo     | 39.0 ± 18.5      | 5.7    | 7.5    | N/A           | N/A          | N/A                            | N/A          | 5.7           |
| Aras[18]              | 2006 | 67           | 41.0 ± 18.0      | 66.0     | 3.0 ± 1.1                | Jenni               | Echo     | 43.5 ± 14.4      | 12.0   | 36.0   | N/A           | yes          | 28.3                           | 6.0          | 9.0           |
| Finsterer[19]         | 2008 | 104          | 14.0–94.0        | 71.0     | 12.0                     | Stollberger         | Echo     | N/A              | N/A    | N/A    | N/A           | N/A          | N/A                            | 9.0          | 15.0          |
| Fazio[20]             | 2008 | 238          | 41.5 (1.0–92.0)  | 58.0     | 7.3 (1.0–12.0)           | Stollberger         | Echo     | 24.6             | N/A    | N/A    | N/A           | N/A          | N/A                            | 14.0         | 2.1           |
| Yousef[21]            | 2009 | 42           | 48.7 ± 2.3       | 59.5     | N/A                      | Jenni               | Echo     | 41.1 ± 14.8      | 28.6   | N/A    | N/A           | N/A          | N/A                            | 14.0         | N/A           |
| Stanton[22]           | 2009 | 30           | 39.0 ± 19.5      | 60.0     | 2.5 ± 1.2                | Jenni               | Echo     | 41.0 ± 15.0      | 16.6   | 10.0   | N/A           | yes          | 30.0                           | 0            | 0             |
| Shoji[23]             | 2010 | 187          | 41.3 ± 16.8      | 65.8     | N/A                      | Jenni               | Echo     | 62.2             | 4.8    | 1.1    | N/A           | N/A          | N/A                            | 0.5          | N/A           |
| Habib[24]             | 2011 | 105          | 45.0 ± 17.0      | 66.0     | 2.3 ± 1.5                | Jenni               | Echo     | 46.0 ± 18.0      | 7.0    | 7.0    | yes           | N/A          | 29.2                           | 4.0          | 8.5           |
| Greutmann[25]         | 2012 | 132          | 41.0 ± 17.0      | 35.0     | 2.7 (0.1–19.4)           | Jenni               | Echo     | 41.0 ± 18.0      | 24.0   | 7.0    | yes           | yes          | 36.0                           | 3.0          | 4.0           |
| Yun[26]               | 2011 | 11           | 35.0 (15.0–58.0) | 81.8     | N/A                      | Petersen            | MRI      | 40.0 (23.0–70.0) | 0      | 0      | N/A           | N/A          | N/A                            | 9.1          | N/A           |
| Stollberger[27]       | 2013 | 169          | 52.9 ± 16.0      | 70.0     | 16.0                     | Stollberger         | Echo     | FS 24.2 ± 11.0   | 16.6   | N/A    | N/A           | N/A          | N/A                            | 15.0         | N/A           |
| Nikolić[28]           | 2012 | 12           | 45.0 ± 15.0      | 58.3     | N/A                      | Jenni               | Echo     | 49.8 ± 8.0       | 33.3   | 25.0   | N/A           | N/A          | N/A                            | 0            | N/A           |
| Caliskan[29]          | 2012 | 84           | 40.0 (17.0–77.0) | 47.6     | 5.3 (1.5–9.6)            | Jenni               | Echo     | FS 20.8 ± 8.2    | 9.5    | 19.0   | N/A           | N/A          | N/A                            | 10.7         | N/A           |
| Stacey[30]            | 2013 | 122          | 57.0 ± 17.5      | 59.0     | N/A                      | Jacquier            | MRI      | 44.0 ± 16.0      | N/A    | 4.9    | N/A           | N/A          | N/A                            | 8.2          | N/A           |
| Tian[31]              | 2014 | 106          | 46.0 ± 17.0      | 78.0     | 2.9 ± 2.1                | Jenni               | Echo     | 39.0 ± 14.0      | 13.0   | 2.0    | yes           | N/A          | 9.0                            | 6.0          | 4.0           |
| Peters[32]            | 2014 | 55           | 42.2 ± 11.5      | 38.2     | 1.4 ± 0.5                | Jenni               | Echo     | 29.6 ± 11.8      | 1.8    | 1.8    | yes           | N/A          | 29.1                           | 16.3         | 1.8           |

| Author                  | Year | Patients (n) | Age (years)        | Male (%) | Follow-up period (years) | Diagnostic criteria                          | Echo/MRI  | LVEF (%)              | AF (%) | VT (%) | Anticoagulant | Antiplatelet | Anticoagulant/Antiplatelet (%) | Hx of TE (%) | TE events (%) |
|-------------------------|------|--------------|--------------------|----------|--------------------------|----------------------------------------------|-----------|-----------------------|--------|--------|---------------|--------------|--------------------------------|--------------|---------------|
| Li[33]                  | 2015 | 20           | 42.5 (36.3–52.5)   | 60.0     | 1.1±0.5                  | Stollberger                                  | Echo      | 32.0 (22.0–40.0)      | 5.0    | 5.0    | yes           | yes          | 60.0                           | N/A          | 0             |
| Akhour[34]              | 2015 | 24           | 42.7 ± 13.1        | 66.7     | N/A                      | Petersen                                     | MRI       | 37.8 ± 13.9           | 16.7   | 20.8   | N/A           | N/A          | N/A                            | 4.2          | N/A           |
| Stöllberger[35]         | 2015 | 232          | 52.0 ± 17.0        | 69.0     | 6.0 ± 5.2                | Stollberger                                  | Echo      | FS 25.0 ± 11.0        | 16.0   | N/A    | N/A           | N/A          | N/A                            | N/A          | 4.3           |
| Amzulescu[36]           | 2015 | 59           | 52.0 ± 13.0        | 57.6     | 3.4 (1.5 – 6.3)          | Petersen                                     | MRI       | 24.1 ± 8.3            | 3.0    | N/A    | yes           | yes          | 22.0                           | 12.0         | 6.8           |
| Minamisawa[37]          | 2016 | 23           | 54.9 ± 9.1         | 69.6     | 5.1                      | Jenni                                        | Echo      | 27.4 ± 8.5            | 43.5   | N/A    | yes           | N/A          | 43.4                           | 8.7          | N/A           |
| Zhou[38]                | 2016 | 31           | 40.8 ± 4.8         | 61.3     | N/A                      | Jenni                                        | Echo      | 42.0 ± 5.9            | N/A    | N/A    | N/A           | N/A          | N/A                            | 6.5          | N/A           |
| Andreini[39]            | 2016 | 113          | 44.0 ± 17.0        | 62.0     | 4 ± 2                    | Jenni, Petersen                              | Echo /MRI | 42.8 ± 16.2           | N/A    | N/A    | yes           | yes          | 5.0                            | N/A          | 4.4           |
| Muser[40]               | 2017 | 9            | 42.0 ± 15.0        | 55.6     | 4.0 (1.0 – 11.0)         | Jenni                                        | Echo      | 40.0 ± 12.1           | N/A    | 44.4   | yes           | N/A          | 66.6                           | N/A          | 11.1          |
| Asfalou[41]             | 2017 | 23           | 47.0 ± 13.0        | 65.2     | 2.0                      | Jenni                                        | Echo      | 27.0 ± 8.0            | 21.7   | 16.6   | yes           | N/A          | 28.6                           | N/A          | 4.3           |
| Tavares de Melo[42]     | 2017 | 30           | 41.0 ± 12.0        | 53.0     | N/A                      | Petersen                                     | MRI       | 39.0 ± 14.0           | N/A    | 33.0   | yes           | N/A          | 77.0                           | 13.0         | N/A           |
| Mazurkiewicz[43]        | 2017 | 127          | 33.1 ± 8.8         | 61.4     | 2.2 ± 1.0                | Grothoff                                     | MRI       | 27.7 ± 6.8            | 11.8   | N/A    | N/A           | N/A          | N/A                            | 8.7          | 1.6           |
| Nucifora[8]             | 2017 | 20           | 35.0 ± 7.0         | 75.0     | N/A                      | Petersen, Jacquiere                          | MRI       | 55.0 ± 14.0           | N/A    | 10.0   | N/A           | N/A          | N/A                            | 10.0         | N/A           |
| Sedaghat-Hamedani[44]   | 2017 | 95           | 41.0 ± 14.4        | 70.6     | 5.1                      | Jenni, Stollberger                           | Echo      | 38.0 ± 15.3           | 29.4   | 35.3   | N/A           | N/A          | N/A                            | N/A          | 10.3          |
| Salazar-Mendiguchía[45] | 2019 | 75           | 50.4 ± 14.8        | 68.0     | 5.0 (2.4 – 6.7)          | Jenni                                        | Echo      | 32.0 (29.0 – 34.0)    | 38.7   | 4.0    | yes           | yes          | 53.3                           | 1.3          | 5.3           |
| Martinez[46]            | 2017 | 13           | N/A                | N/A      | N/A                      | Jenni                                        | Echo      | N/A                   | N/A    | N/A    | N/A           | yes          | N/A                            | 8.0          | N/A           |
| van Waning[9]           | 2018 | 275          | 45.0 (33.0 – 56.0) | 54.0     | 2.1 (0.3 – 4.8)          | Jenni, Petersen                              | Echo /MRI | N/A                   | 16.0   | 6.0    | N/A           | N/A          | N/A                            | 3.0          | 13.0          |
| Araujo-Filho[47]        | 2018 | 36           | 41.0 ± 13.0        | 61.0     | N/A                      | Petersen                                     | MRI       | 42.0 ± 6.0            | N/A    | 30.6   | yes           | N/A          | 55.6                           | 8.3          | N/A           |
| Sohns[48]               | 2019 | 18           | 43.5 ± 18.0        | 66.7     | 5.2 ± 3.5                | Jenni                                        | Echo      | 35.0 ± 15.0           | 11.1   | 66.7   | yes           | N/A          | 77.8                           | 27.8         | N/A           |
| van Waning[49]          | 2019 | 216          | 38.0 (23.0 – 52.0) | 54.0     | 3.7 (0.8 – 7.8)          | Jenni, Petersen, Grothoff                    | Echo /MRI | N/A                   | 11.6   | 11.6   | N/A           | N/A          | N/A                            | N/A          | 4.6           |
| Azevedo[50]             | 2019 | 78           | 47.0 ± 17.0        | 62.8     | 4.4 ± 2.8                | Jenni, Stollberger, Chin, Petersen Jacquiere | Echo /MRI | 47.2 ± 15.2           | 13.5   | 21.6   | N/A           | N/A          | N/A                            | 5.1          | 11.5          |
| Macaione[51]            | 2020 | 27           | 47.6 ± 22.6        | 77.8     | N/A                      | Jenni, Petersen, Grothoff                    | Echo /MRI | 48.5 ± 17.6           | N/A    | 11.1   | N/A           | N/A          | N/A                            | 3.7          | N/A           |
| Asmakutlu[52]           | 2020 | 42           | 32.4 (18.0 – 63.0) | 52.3     | N/A                      | Stollberger, Petersen                        | Echo /MRI | 50.3 (22.0 – 67.0)    | 4.7    | 11.9   | N/A           | N/A          | N/A                            | 14.2         | N/A           |
| Rocon[53]               | 2020 | 108          | 38.3 ± 15.5        | 48.1     | 5.8 ± 3.9                | Chin, Jenni, Stollberger, Petersen           | Echo /MRI | 45.3 ± 14.6           | N/A    | 61.7   | N/A           | N/A          | N/A                            | N/A          | 17.0          |
| Rapatz[54]              | 2020 | 113          | 57.0 (45.0 – 69.0) | 76.0     | 6.1 ± 5.3                | Stollberger                                  | Echo      | FS 20.0 (15.0 – 30.0) | 20.0   | N/A    | N/A           | N/A          | N/A                            | 12.0         | 6.0           |
| Zemrak[55]              | 2020 | 142          | N/A                | N/A      | N/A                      | Petersen                                     | MRI       | N/A                   | N/A    | N/A    | N/A           | N/A          | N/A                            | 1.3          | N/A           |
| Femia[56]               | 2020 | 98           | 47.0 (31.0 – 65.0) | 56.7     | 6.5 (5.5 – 7.5)          | Petersen                                     | MRI       | 81.2 ± 7.2            | 1.0    | 16.3   | N/A           | N/A          | N/A                            | 7.1          | 4.1           |
| Galizio[57]             | 2011 | 80           | 41.0 ± 17.0        | 66.3     | 1.1 (0.5 – 2.1)          | Chin, Jenni, Stollberger, Petersen           | Echo /MRI | 38.6 ± 11.4           | N/A    | 18.8   | N/A           | N/A          | N/A                            | N/A          | 3.75          |

Echo, echocardiography; MRI magnetic resonance imaging; LVEF, left ventricular ejection fraction; AF; atrial fibrillation; VT, ventricular tachycardia; Hx, history; TE, thromboembolism; N/A, not applicable; FS, fractional shortening.

**Supplemental Table 5. Result of multiple linear regression analysis coefficients for logarithmic-transformed prevalence of thromboembolism**

| Model                | Unstandardized coefficients |                |           |           | Standardized coefficients |       | P value | Variance Inflation Factor |
|----------------------|-----------------------------|----------------|-----------|-----------|---------------------------|-------|---------|---------------------------|
|                      | $\beta$                     | Standard error | Lower CI  | Upper CI  | $\beta$                   | T     |         |                           |
| Constant             | 3.0518441                   | 0.672898       | 1.5296435 | 4.5740446 | 0                         | 4.54  | 0.0014  |                           |
| Follow-up period (y) | 0.386106                    | 0.164966       | 0.0129269 | 0.7592851 | 0.730529                  | 2.34  | 0.0440  | 1.8558142                 |
| LVEF (%)             | -0.046194                   | 0.017301       | -0.085332 | -0.007057 | -0.83592                  | -2.67 | 0.0256  | 1.8671364                 |
| AF (%)               | -0.053726                   | 0.018199       | -0.094894 | -0.012558 | -0.90918                  | -2.95 | 0.0162  | 1.8067165                 |

CI, confidence interval; LVEF, left ventricular ejection fraction; AF; atrial fibrillation.

**Supplemental Table 6. Comparison of clinical characteristics between pediatric patients with and without TE**

|                 | TE negative (n<br>= 281) | TE positive (n<br>= 6) | <i>P</i> value |
|-----------------|--------------------------|------------------------|----------------|
| Male            | 142                      | 4                      | 1.0000         |
| FH              | 72                       | 2                      | 1.0000         |
| CHD             | 37                       | 0                      | 1.0000         |
| HF at diagnosis | 154                      | 5                      | 0.2303         |
| LVEF (%)        | 46.9 ± 18.9              | 30.3 ± 19.9            | 0.0648         |
| LVEF<40%        | 89                       | 4                      | 0.0608         |
| AF              | 2                        | 0                      | 1.0000         |
| VT              | 29                       | 1                      | 0.4876         |
| Anticoagulant   | 3                        | 1                      | 0.0298         |
| Antiplatelet    | 7                        | 0                      | 1.0000         |

FX, family history; CHD, congenital heart disease; HF, heart failure; LVEF, left ventricular ejection fraction; AF, atrial fibrillation; VT, ventricular tachycardia



**Supplemental Table 7. Comparison of clinical characteristics between adult patients with and without TE**

|                 | TE negative (n<br>= 21) | TE positive (n<br>= 5) | <i>P</i> value |
|-----------------|-------------------------|------------------------|----------------|
| Male            | 14                      | 5                      | 0.2782         |
| FH              | 2                       | 1                      | 0.3333         |
| CHD             | 0                       | 0                      | 1.0000         |
| HF at diagnosis | 7                       | 3                      | 0.3402         |
| LVEF (%)        | 39.8 ± 13.8             | 40                     | 1.0000         |
| LVEF<40%        | 3                       | 0                      | 1.0000         |
| AF              | 4                       | 1                      | 1.0000         |
| VT              | 9                       | 1                      | 0.6169         |

FX, family history; CHD, congenital heart disease; HF, heart failure; LVEF, left ventricular ejection fraction; AF, atrial fibrillation; VT, ventricular tachycardia

**Supplemental Figure 1. Summaries of forest plots of the mean prevalence of arrhythmia and LVEF in patients with LVNC**

Mean prevalence of atrial fibrillation (AF) in pediatric (A) and adult patients (B). Mean prevalence of ventricular tachycardia (VT) in pediatric (C) and adult patients (D). Mean LVEF in pediatric (E) and adult patients (F).

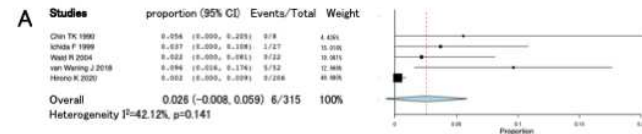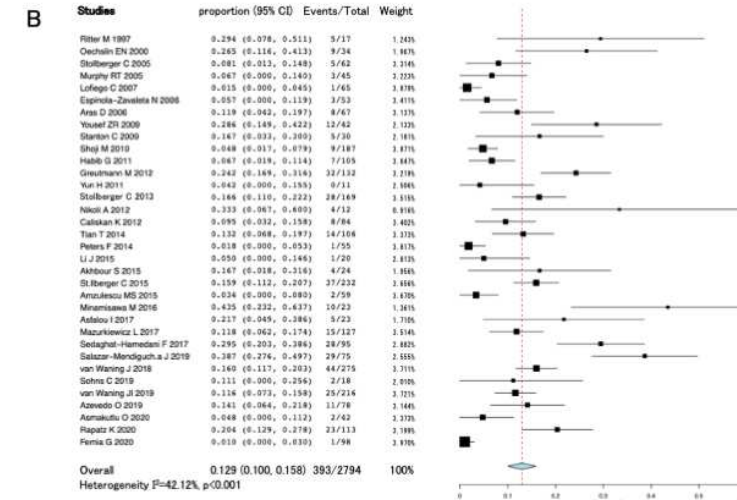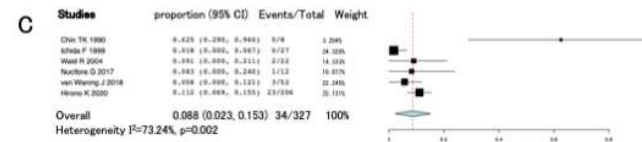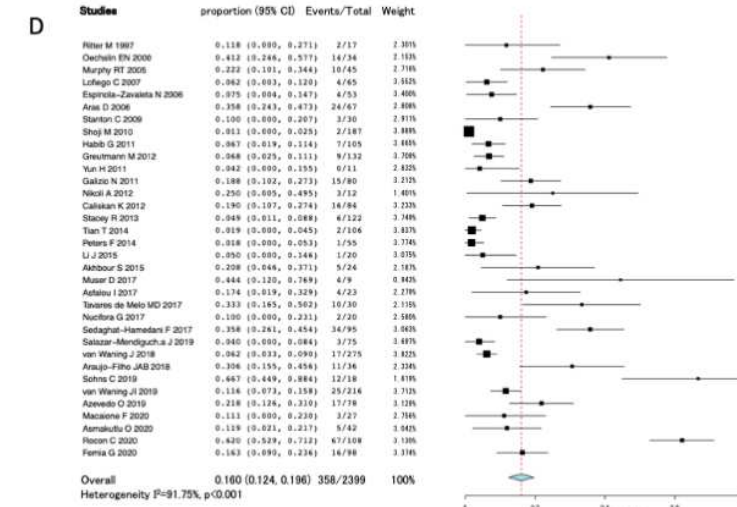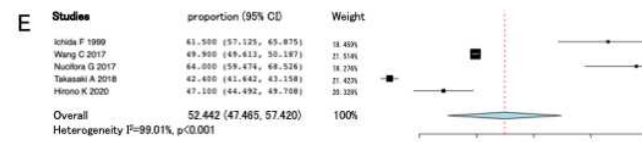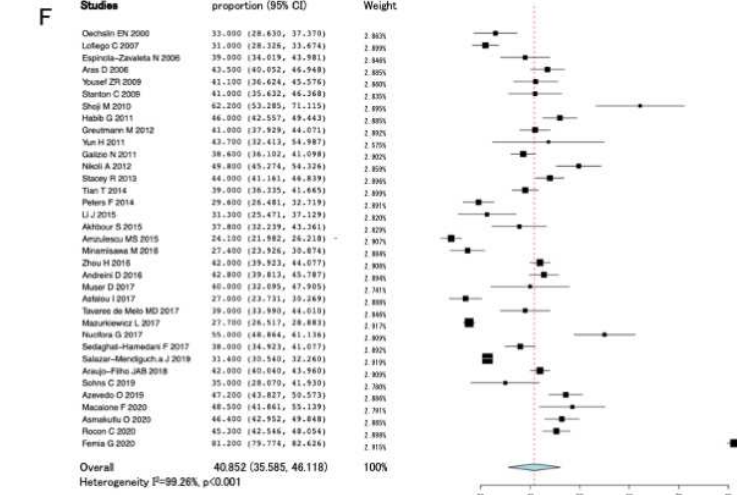

**Supplemental Figure 2. Funnel plot of the assessment of publication bias for studies**

Funnel plot of the assessment of publication bias for studies regarding the prevalence (A) and incidence (B) of TE in the patients with LVNC

**A**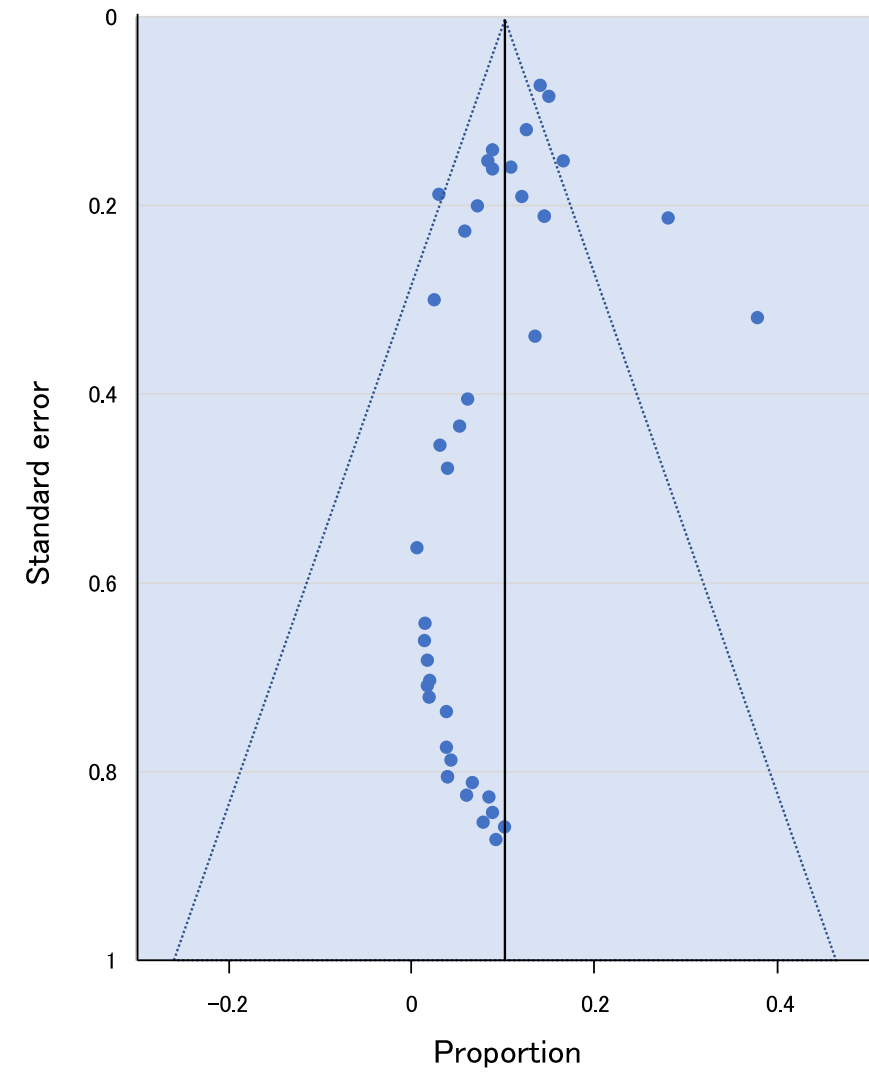**B**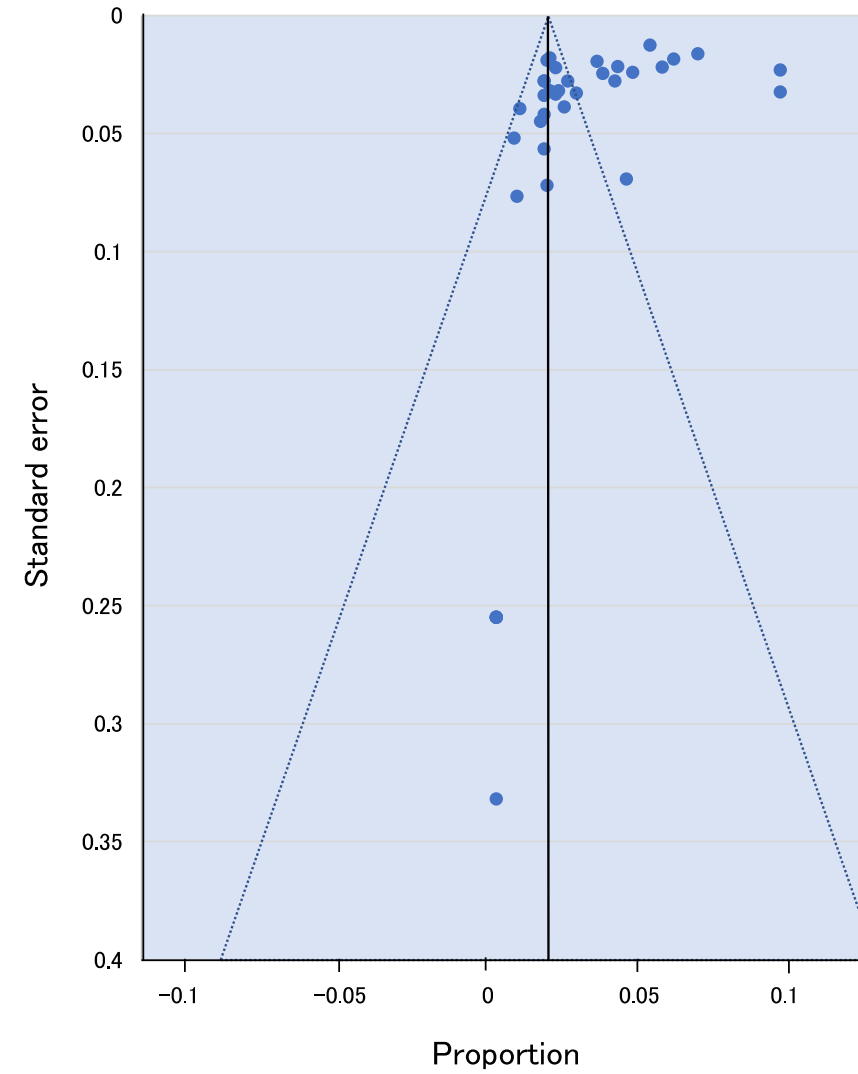

**Supplemental Figure 3. Forest plot of the mean prevalence of thromboembolism in the patients with LVNC according to subgroup analysis**

Mean prevalence of thromboembolism in studies with average LVEF &lt;40% (A) and &gt;40% (B).

Mean prevalence of thromboembolism in studies with mean follow-up period &lt;4years (C) and &gt;4years (D).

Mean prevalence of thromboembolism in studies with mean prevalence of AF &lt;10% (E) and prevalence of AF &gt;10% (F).

CI, confidence interval.

**A**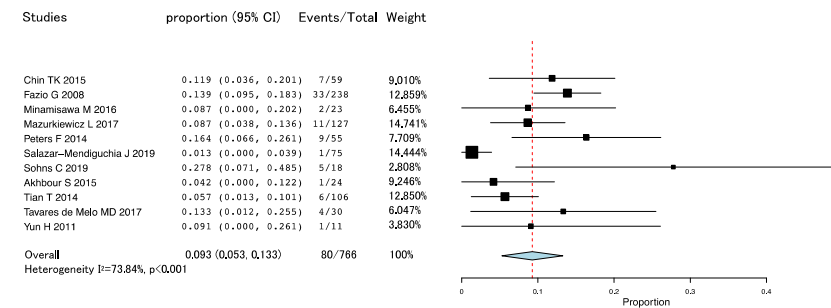**B**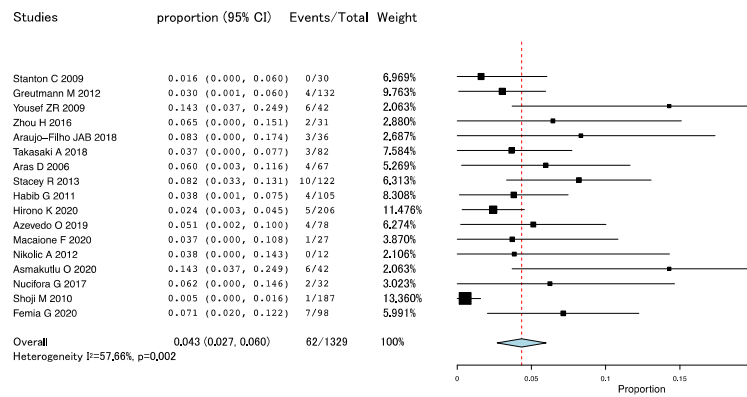**C**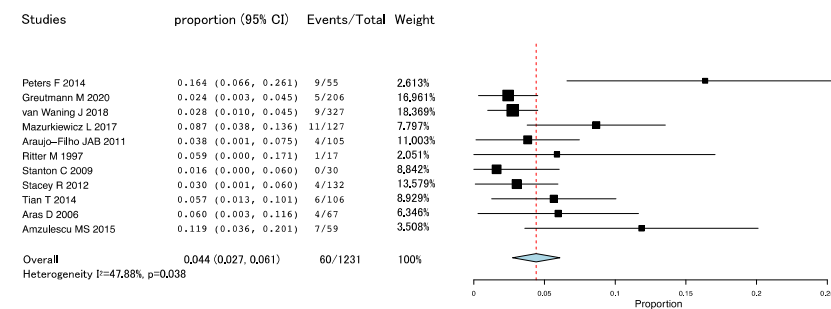**D**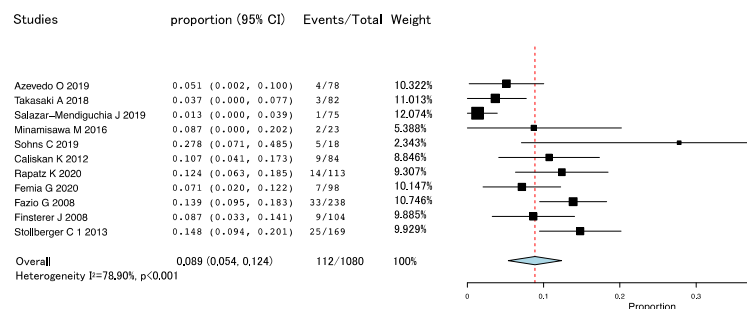**E**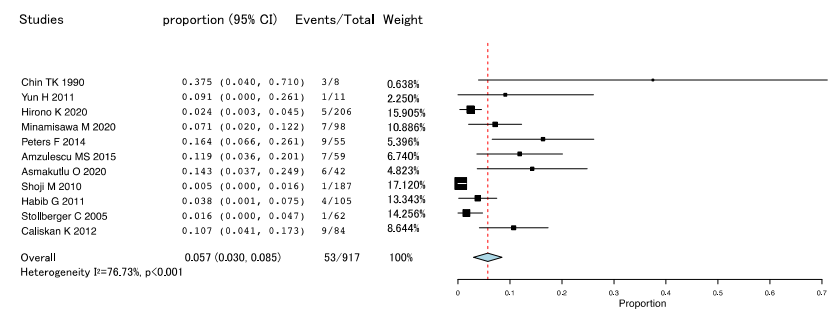**F**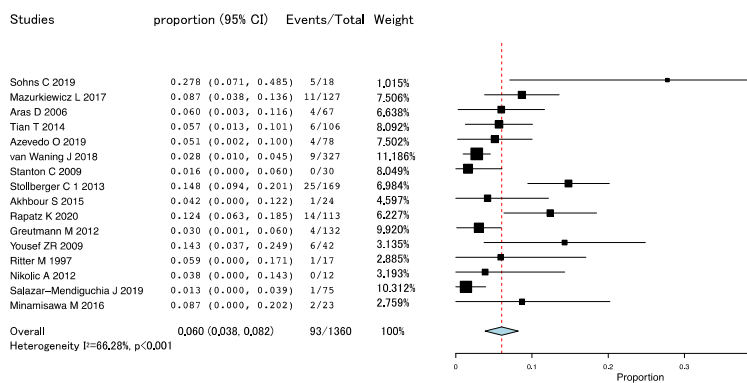

**Supplemental Figure 4. Forest plot of the mean incidence of thromboembolism in the patients with LVNC according to subgroup analysis**

Mean incidence of thromboembolism in studies with average LVEF <40% (A) and >40% (B).

Mean incidence of thromboembolism in studies with mean follow-up period <4years (C) and >4years (D).

Mean incidence of thromboembolism in studies with mean prevalence of AF <10% (E) and prevalence of AF >10% (F).

CI, confidence interval.

**A**

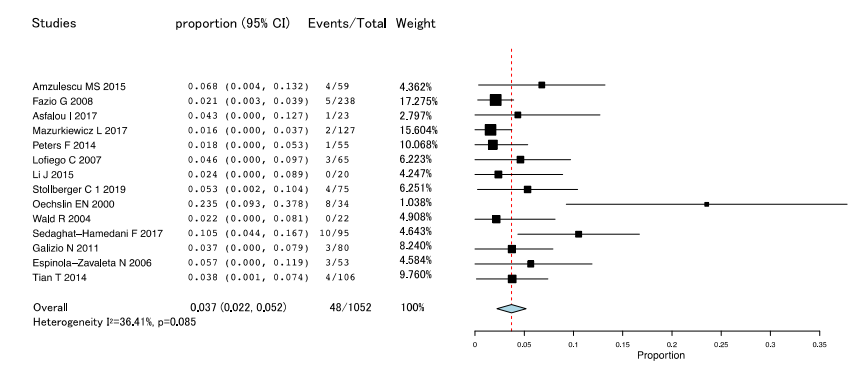

**B**

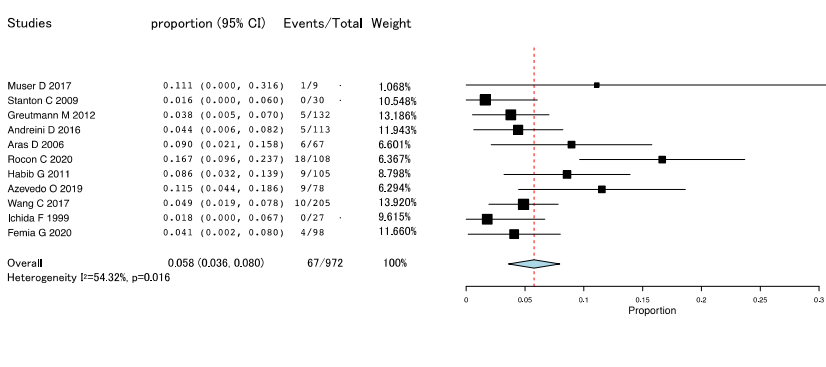

**C**

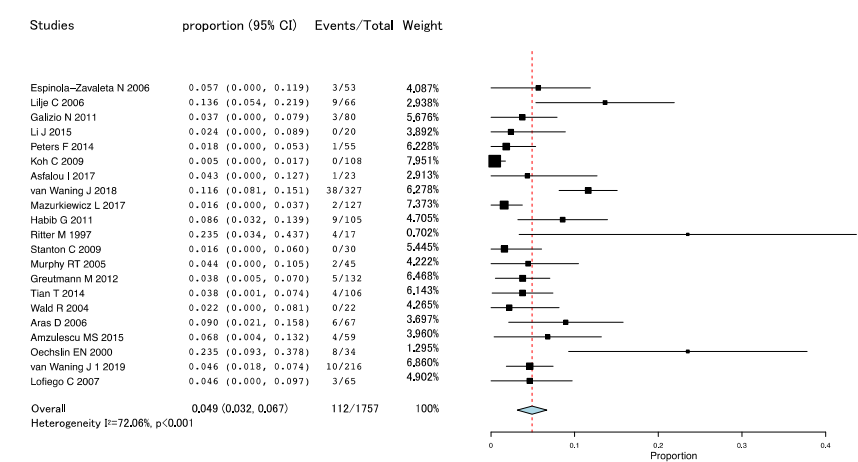

**D**

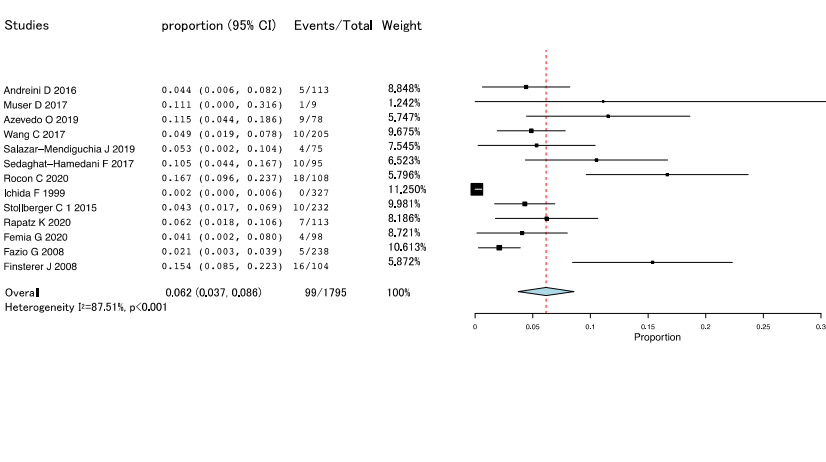

**E**

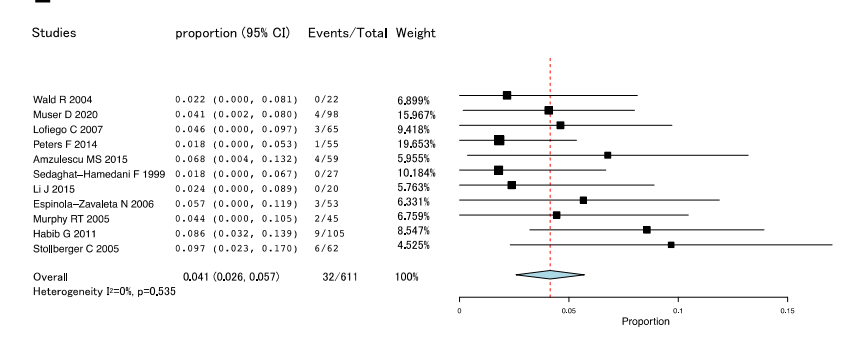

**F**

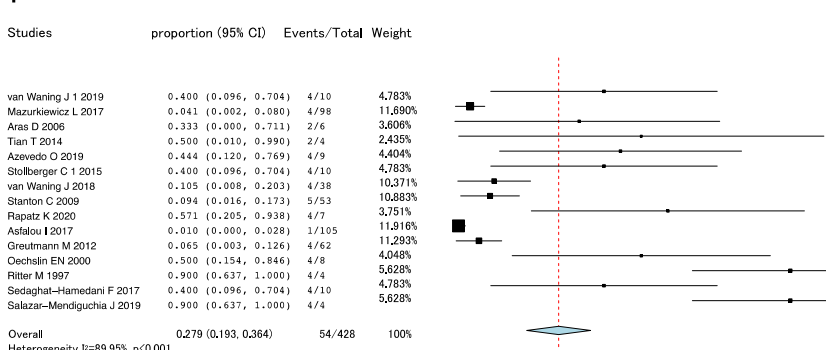

**Supplemental Figure 5. Forest plot of the mean prevalence and incidence of thromboembolism in the patients with LVNC excluding studies in which antithrombotic treatment in more than 30% of patient's population**

Mean prevalence of thromboembolism in all patients (A) and adult patients (B) with LVNC.

Mean incidence of thromboembolism in the whole aged (C) and adult patients (D) with LVNC.

CI, confidence interval.

**A**

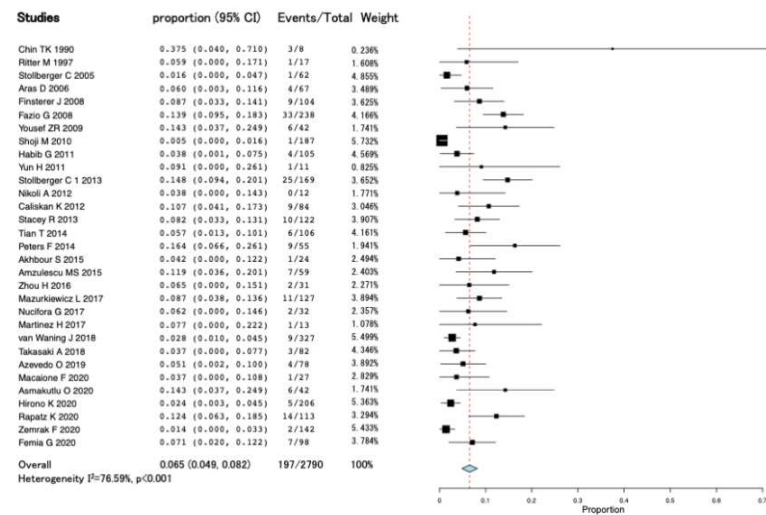

**B**

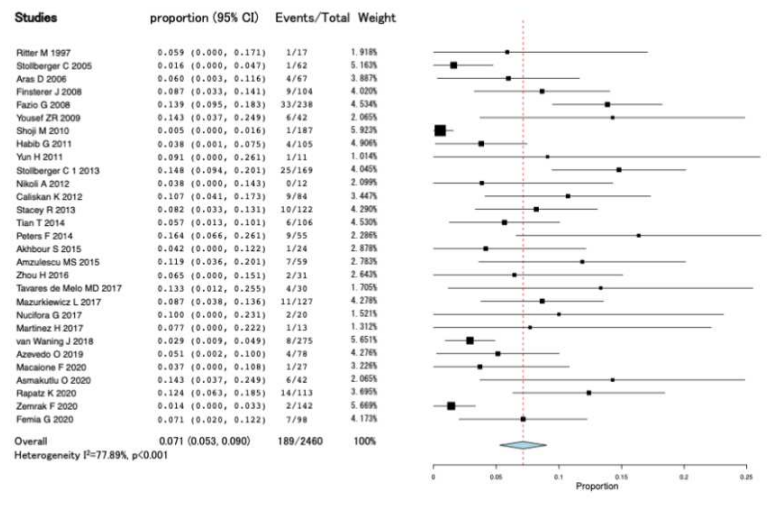

**C**

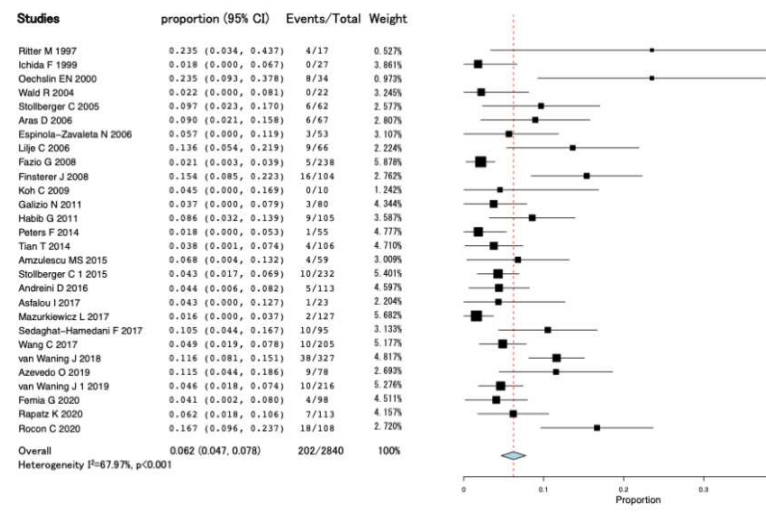

**D**

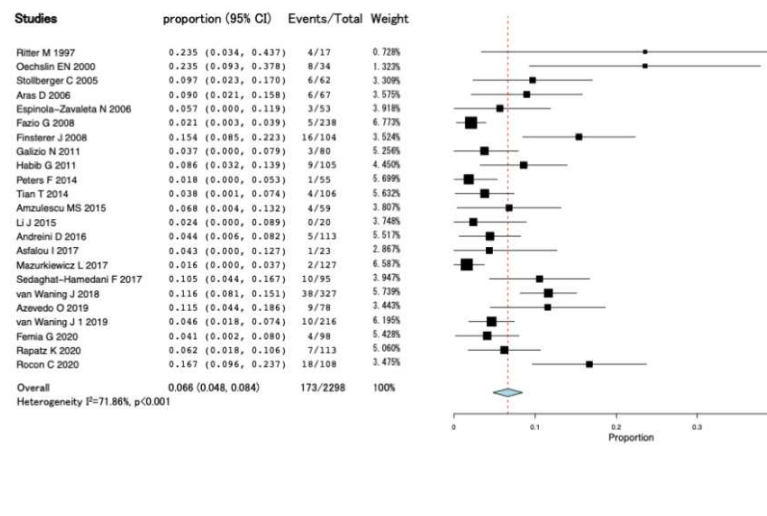



**Supplemental Figure 6. Forest plot of the mean mortality rates in the patients with LVNC according to subgroup analysis**

The mean mortality rates in studies with average LVEF &lt;40% (A) and &gt;40% (B).

The mean mortality rates in studies with mean follow-up period &lt;4years (C) and &gt;4years (D).

The mean mortality rates in studies with mean prevalence of AF &lt;10% (E) and prevalence of AF &gt;10% (F).

CI, confidence interval.

**A**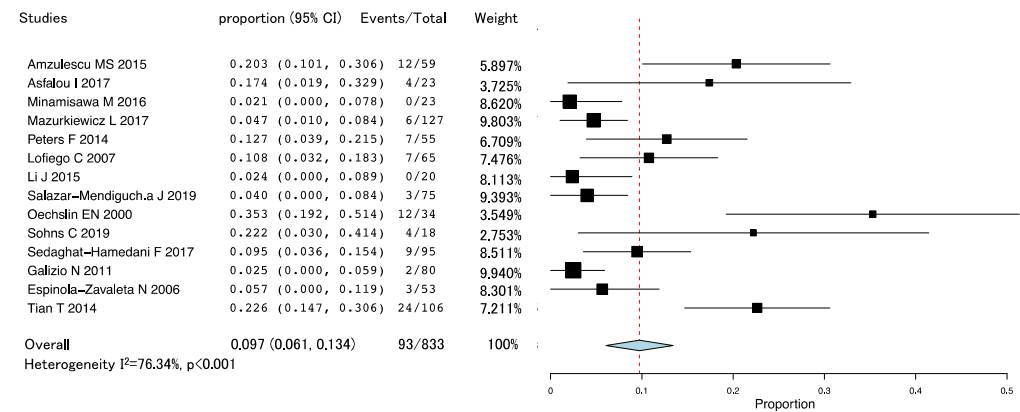**B**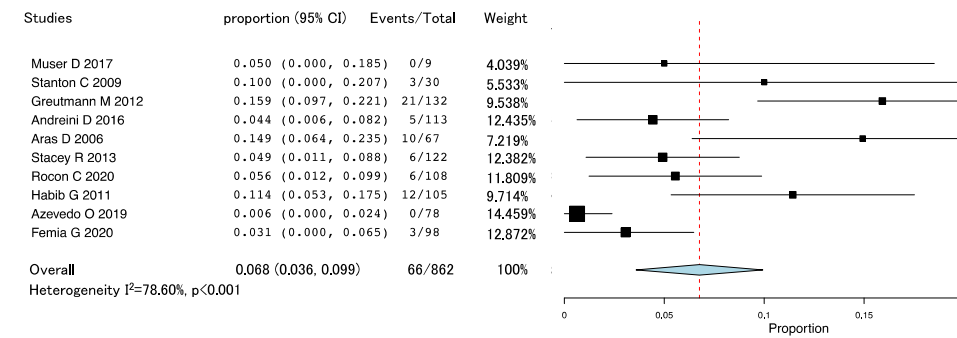**C**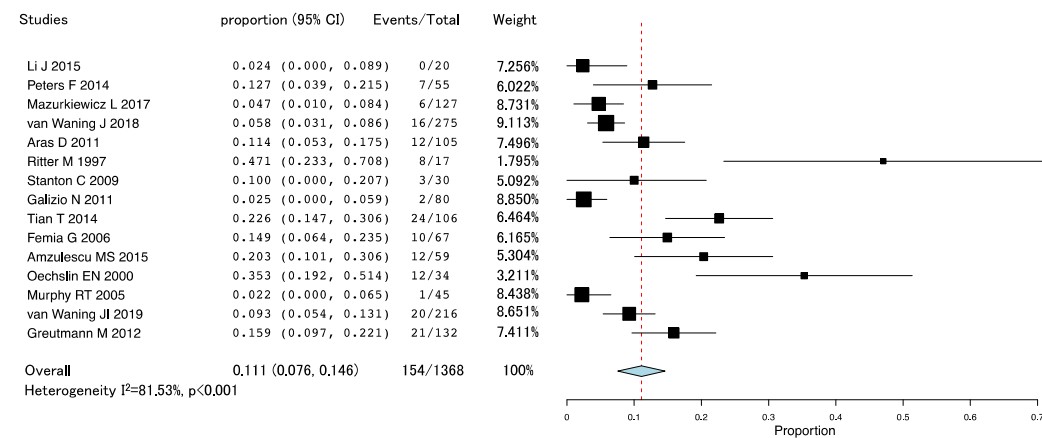**D**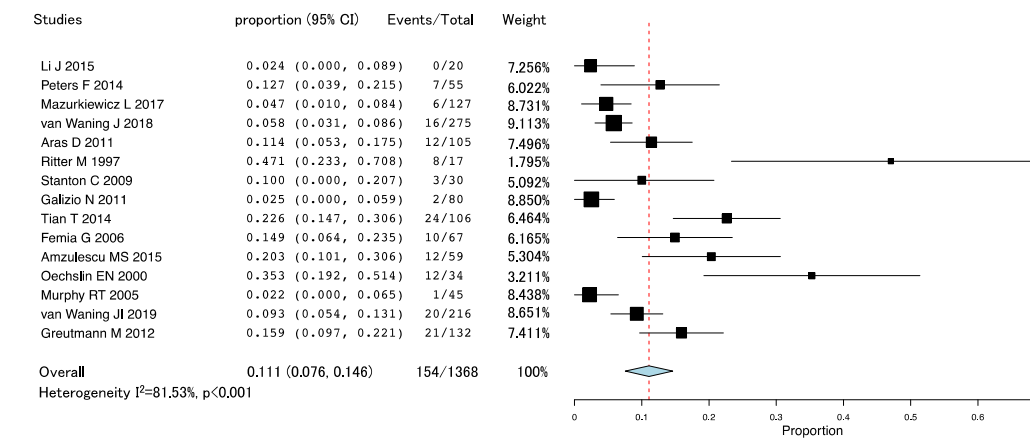**E**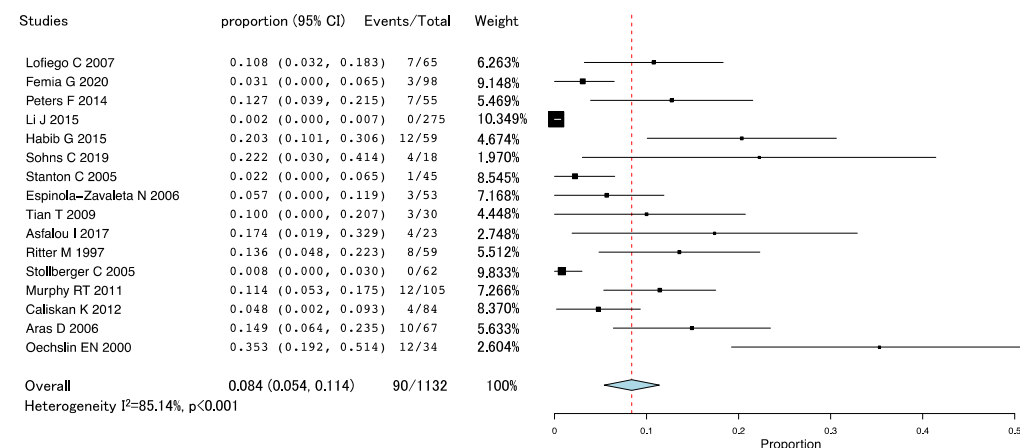**F**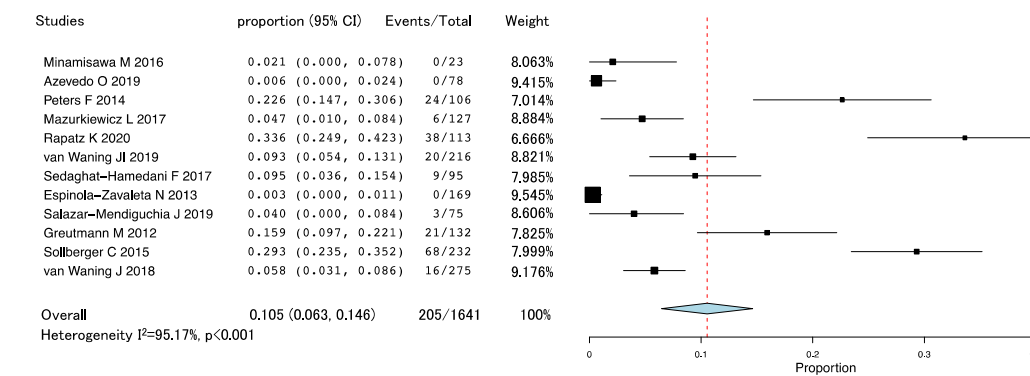

**Supplemental Figure 7. Forest plot of the mean mortality and heart plantation rates in the patients with LVNC according to subgroup analysis**

The mean mortality and heart plantation rates in studies with average LVEF <40% (A) and >40% (B).

The mean mortality and heart plantation rates in studies with mean follow-up period <4years (C) and >4years (D).

The mean mortality and heart plantation rates in studies with mean prevalence of AF <10% (E) and prevalence of AF >10% (F).

CI, confidence interval.

**A**

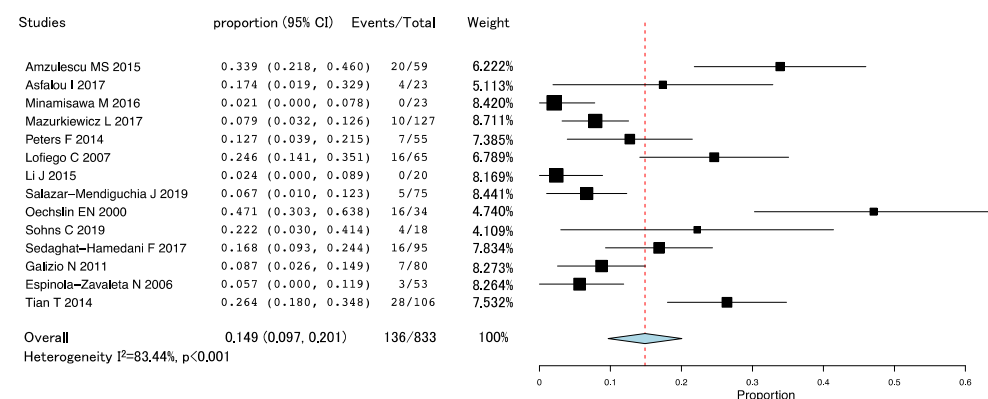

**B**

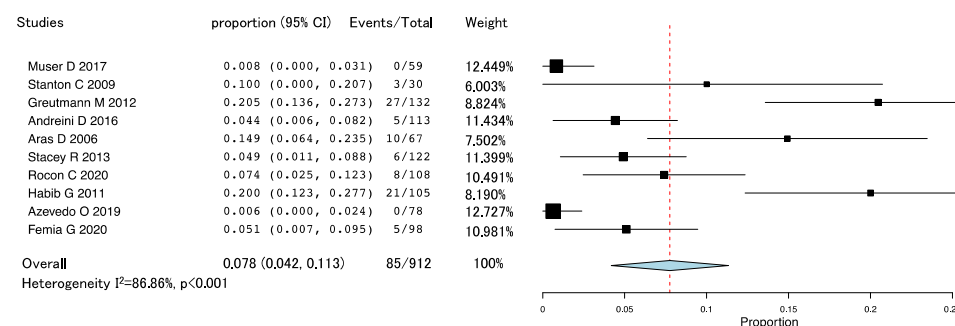

**C**

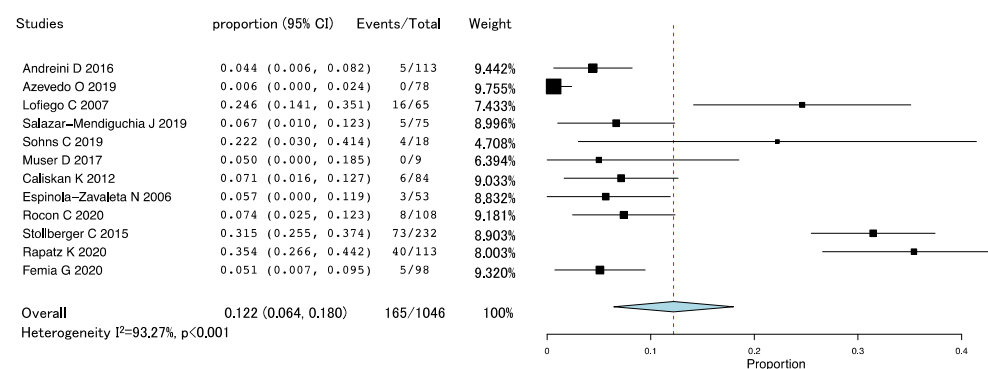

**D**

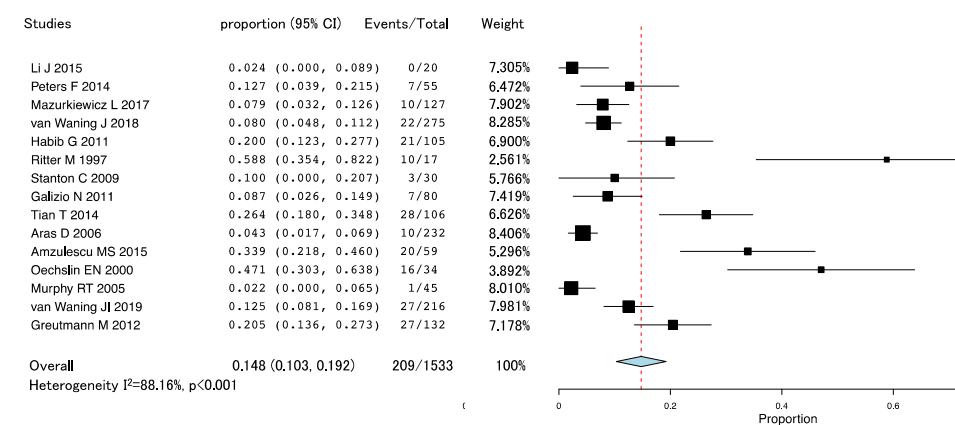

**E**

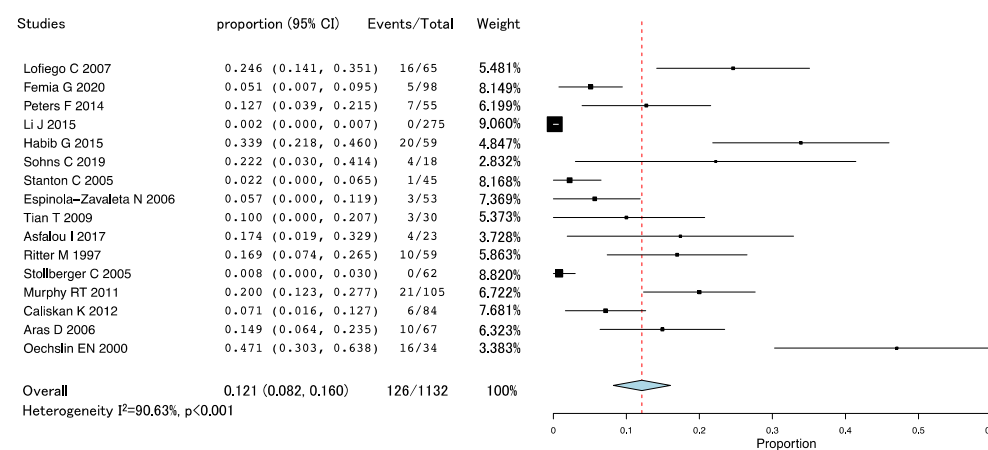

**F**

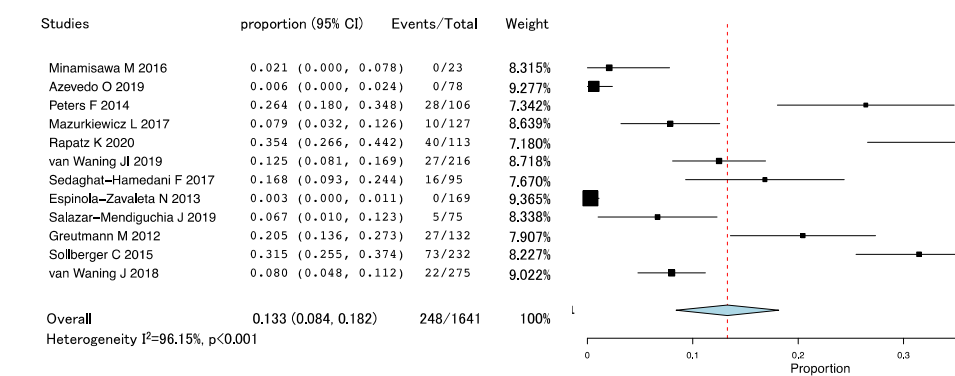



## REFERENCES

- 1 Chin TK, Perloff JK, Williams RG, et al. Isolated noncompaction of left ventricular myocardium. A study of eight cases. *Circulation* 1990;**82**:507-13.
- 2 Ichida F, Hamamichi Y, Miyawaki T, et al. Clinical features of isolated noncompaction of the ventricular myocardium: long-term clinical course, hemodynamic properties, and genetic background. *J Am Coll Cardiol* 1999;**34**:233-40.
- 3 Pignatelli RH, McMahon CJ, Dreyer WJ, et al. Clinical characterization of left ventricular noncompaction in children: a relatively common form of cardiomyopathy. *Circulation* 2003;**108**:2672-8.
- 4 Wald R, Veldtman G, Golding F, et al. Determinants of outcome in isolated ventricular noncompaction in childhood. *Am J Cardiol* 2004;**94**:1581-4.
- 5 Lilje C, Razek V, Joyce JJ, et al. Complications of non-compaction of the left ventricular myocardium in a paediatric population: a prospective study. *Eur Heart J* 2006;**27**:1855-60.
- 6 Koh C, Lee PW, Yung TC, et al. Left ventricular noncompaction in children. *Congenit Heart Dis* 2009;**4**:288-94.
- 7 Wang C, Takasaki A, Watanabe Ozawa S, et al. Long-Term Prognosis of Patients With Left Ventricular Noncompaction- Comparison Between Infantile and Juvenile Types. *Circ J* 2017;**81**:694-700.
- 8 Nucifora G, Sree Raman K, Muser D, et al. Cardiac magnetic resonance evaluation of left ventricular functional, morphological, and structural features in children and adolescents vs. young adults with isolated left ventricular non-compaction. *Int J Cardiol* 2017;**246**:68-73.
- 9 van Waning JI, Caliskan K, Hoedemaekers YM, et al. Genetics, Clinical Features, and Long-Term Outcome of Noncompaction Cardiomyopathy. *J Am Coll Cardiol* 2018;**71**:711-22.
- 10 Takasaki A, Hirono K, Hata Y, et al. Sarcomere gene variants act as a genetic trigger underlying the development of left ventricular noncompaction. *Pediatr Res* 2018;**84**:733-42.
- 11 Hirono K, Hata Y, Miyao N, et al. Increased Burden of Ion Channel Gene Variants Is Related to Distinct Phenotypes in Pediatric Patients With Left Ventricular Noncompaction. *Circ Genom Precis Med* 2020;**13**:e002940.
- 12 Ritter M, Oechslin E, Sutsch G, et al. Isolated noncompaction of the myocardium in adults. *Mayo Clin Proc* 1997;**72**:26-31.
- 13 Oechslin EN, Attenhofer Jost CH, Rojas JR, et al. Long-term follow-up of 34 adults with isolated left ventricular noncompaction: a distinct cardiomyopathy with poor prognosis. *J Am Coll Cardiol* 2000;**36**:493-500.
- 14 Stollberger C, Finsterer J. Left ventricular hypertrabeculation/noncompaction and stroke or embolism. *Cardiology* 2005;**103**:68-72.
- 15 Murphy RT, Thaman R, Blanes JG, et al. Natural history and familial characteristics of isolated left ventricular non-compaction. *Eur Heart J* 2005;**26**:187-92.
- 16 Lofiego C, Biagini E, Pasquale F, et al. Wide spectrum of presentation and variable outcomes of isolated left ventricular non-compaction. *Heart* 2007;**93**:65-71.
- 17 Espinola-Zavaleta N, Soto ME, Castellanos LM, et al. Non-compacted cardiomyopathy: clinical-echocardiographic study. *Cardiovasc Ultrasound* 2006;**4**:35.
- 18 Aras D, Tufekcioglu O, Ergun K, et al. Clinical features of isolated ventricular noncompaction in adults long-term clinical course, echocardiographic properties, and predictors of left ventricular failure. *J Card Fail* 2006;**12**:726-33.
- 19 Finsterer J, Stollberger C, Molzer G, et al. Cerebrovascular events in left ventricular hypertrabeculation/noncompaction with and without myopathy. *Int J Cardiol* 2008;**130**:344-8.
- 20 Fazio G, Corrado G, Zachara E, et al. Anticoagulant drugs in noncompaction: a mandatory therapy? *J*

*Cardiovasc Med (Hagerstown)* 2008;**9**:1095-7.

- 21 Yousef ZR, Foley PW, Khadjooi K, et al. Left ventricular non-compaction: clinical features and cardiovascular magnetic resonance imaging. *BMC Cardiovasc Disord* 2009;**9**:37.
- 22 Stanton C, Bruce C, Connolly H, et al. Isolated left ventricular noncompaction syndrome. *Am J Cardiol* 2009;**104**:1135-8.
- 23 Shoji M, Yamashita T, Uejima T, et al. Electrocardiography characteristics of isolated non-compaction of ventricular myocardium in Japanese adult patients. *Circ J* 2010;**74**:1431-5.
- 24 Habib G, Charron P, Eicher JC, et al. Isolated left ventricular non-compaction in adults: clinical and echocardiographic features in 105 patients. Results from a French registry. *Eur J Heart Fail* 2011;**13**:177-85.
- 25 Greutmann M, Mah ML, Silversides CK, et al. Predictors of adverse outcome in adolescents and adults with isolated left ventricular noncompaction. *Am J Cardiol* 2012;**109**:276-81.
- 26 Yun H, Zeng MS, Jin H, et al. Isolated noncompaction of ventricular myocardium: a magnetic resonance imaging study of 11 patients. *Korean J Radiol* 2011;**12**:686-92.
- 27 Stollberger C, Wegner C, Finsterer J. CHADS2- and CHA2DS2VASc scores and embolic risk in left ventricular hypertrabeculation/noncompaction. *J Stroke Cerebrovasc Dis* 2013;**22**:709-12.
- 28 Nikolic A, Jovicic L, Tomic S, et al. Left ventricular noncompaction: clinical-echocardiographic study. *Vojnosanit Pregl* 2012;**69**:32-6.
- 29 Caliskan K, Ujvari B, Bauernfeind T, et al. The prevalence of early repolarization in patients with noncompaction cardiomyopathy presenting with malignant ventricular arrhythmias. *J Cardiovasc Electrophysiol* 2012;**23**:938-44.
- 30 Stacey RB, Andersen MM, St Clair M, et al. Comparison of systolic and diastolic criteria for isolated LV noncompaction in CMR. *JACC Cardiovasc Imaging* 2013;**6**:931-40.
- 31 Tian T, Liu Y, Gao L, et al. Isolated left ventricular noncompaction: clinical profile and prognosis in 106 adult patients. *Heart Vessels* 2014;**29**:645-52.
- 32 Peters F, Khandheria BK, Botha F, et al. Clinical outcomes in patients with isolated left ventricular noncompaction and heart failure. *J Card Fail* 2014;**20**:709-15.
- 33 Li J, Franke J, Pribe-Wolferts R, et al. Effects of beta-blocker therapy on electrocardiographic and echocardiographic characteristics of left ventricular noncompaction. *Clin Res Cardiol* 2015;**104**:241-9.
- 34 Akhbour S, Fellat I, Fennich N, et al. Electrocardiographic findings in correlation to magnetic resonance imaging patterns in African patients with isolated ventricular noncompaction. *Anatol J Cardiol* 2015;**15**:550-5.
- 35 Stollberger C, Blazek G, Gessner M, et al. Age-dependency of cardiac and neuromuscular findings in adults with left ventricular hypertrabeculation/noncompaction. *Am J Cardiol* 2015;**115**:1287-92.
- 36 Amzulescu MS, Rousseau MF, Ahn SA, et al. Prognostic Impact of Hypertrabeculation and Noncompaction Phenotype in Dilated Cardiomyopathy: A CMR Study. *JACC Cardiovasc Imaging* 2015;**8**:934-46.
- 37 Minamisawa M, Koyama J, Kozuka A, et al. Regression of left ventricular hypertrabeculation is associated with improvement in systolic function and favorable prognosis in adult patients with non-ischemic cardiomyopathy. *J Cardiol* 2016;**68**:431-8.
- 38 Zhou H, Lin X, Fang L, et al. Characterization of Compacted Myocardial Abnormalities by Cardiac Magnetic Resonance With Native T1 Mapping in Left Ventricular Non-Compaction Patients- A Comparison With Late Gadolinium Enhancement. *Circ J* 2016;**80**:1210-6.
- 39 Andreini D, Pontone G, Bogaert J, et al. Long-Term Prognostic Value of Cardiac Magnetic Resonance in Left Ventricle Noncompaction: A Prospective Multicenter Study. *J Am Coll Cardiol* 2016;**68**:2166-81.

- 40 Muser D, Liang JJ, Witschey WR, et al. Ventricular arrhythmias associated with left ventricular noncompaction: Electrophysiologic characteristics, mapping, and ablation. *Heart Rhythm* 2017;**14**:166-75.
- 41 Asfalou I, Boulaamayi S, Raissouni M, et al. Left ventricular noncompaction-A rare form of cardiomyopathy: Revelation modes and predictors of mortality in adults through 23 cases. *J Saudi Heart Assoc* 2017;**29**:102-9.
- 42 Tavares de Melo MD, Giorgi MCP, Assuncao AN, Jr., et al. Decreased glycolytic metabolism in non-compaction cardiomyopathy by 18F-fluoro-2-deoxyglucose positron emission tomography: new insights into pathophysiological mechanisms and clinical implications. *Eur Heart J Cardiovasc Imaging* 2017;**18**:915-21.
- 43 Mazurkiewicz L, Petryka J, Spiewak M, et al. Clinical and prognostic relevancy of left ventricular trabeculation assessed by cardiac magnetic resonance in patients with dilated cardiomyopathy. *Kardiol Pol* 2017;**75**:794-803.
- 44 Sedaghat-Hamedani F, Haas J, Zhu F, et al. Clinical genetics and outcome of left ventricular non-compaction cardiomyopathy. *Eur Heart J* 2017;**38**:3449-60.
- 45 Salazar-Mendiguchia J, Gonzalez-Costello J, Oliveras T, et al. Long-term Follow-up of Symptomatic Adult Patients With Noncompaction Cardiomyopathy. *Rev Esp Cardiol (Engl Ed)* 2019;**72**:169-71.
- 46 Martinez HR, Ware SM, Schamberger MS, et al. Noncompaction cardiomyopathy and heterotaxy syndrome. *Prog Pediatr Cardiol* 2017;**46**:23-7.
- 47 Araujo-Filho JAB, Assuncao AN, Jr., Tavares de Melo MD, et al. Myocardial T1 mapping and extracellular volume quantification in patients with left ventricular non-compaction cardiomyopathy. *Eur Heart J Cardiovasc Imaging* 2018;**19**:888-95.
- 48 Sohns C, Ouyang F, Volkmer M, et al. Therapy of ventricular arrhythmias in patients suffering from isolated left ventricular non-compaction cardiomyopathy. *Europace* 2019;**21**:961-9.
- 49 van Waning JJ, Caliskan K, Michels M, et al. Cardiac Phenotypes, Genetics, and Risks in Familial Noncompaction Cardiomyopathy. *J Am Coll Cardiol* 2019;**73**:1601-11.
- 50 Azevedo O, Marques N, Craveiro N, et al. Screening for Fabry disease in patients with left ventricular noncompaction. *Rev Port Cardiol* 2019;**38**:709-16.
- 51 Macaione F, Meloni A, Positano V, et al. The planimetric Grothoff's criteria by cardiac magnetic resonance can improve the specificity of left ventricular non-compaction diagnosis in thalassemia intermedia. *Int J Cardiovasc Imaging* 2020;**36**:1105-12.
- 52 Asmakutlu O, Alis D, Topel C, et al. Late gadolinium enhancement on CMRI in patients with LV noncompaction: An overestimated phenomenon? *Clin Imaging* 2020;**66**:121-6.
- 53 Rocon C, Tabassian M, Tavares de Melo MD, et al. Biventricular imaging markers to predict outcomes in non-compaction cardiomyopathy: a machine learning study. *ESC Heart Fail* 2020;**7**:2431-9.
- 54 Rapatz K, Finsterer J, Voill-Glaninger A, et al. NT-pro-BNP in patients with left ventricular hypertrabeculation/non-compaction. *ESC Heart Fail* 2020.
- 55 Zemrak F, Raisi-Estabragh Z, Khanji MY, et al. Left Ventricular Hypertrabeculation Is Not Associated With Cardiovascular Morbidity or Mortality: Insights From the Eurocmr Registry. *Front Cardiovasc Med* 2020;**7**:158.
- 56 Femia G, Zhu D, Choudhary P, et al. Long term clinical outcomes associated with CMR quantified isolated left ventricular non-compaction in adults. *Int J Cardiol* 2021;**328**:235-40.
- 57 Galizio NOG, José L.;Favaloro, Liliana E.;Diez, Mirta;Fernández, Adrián;Guevara, Eduardo;Palazzo, Alejandro A.;Robles, Federico;Casabé, José H.;Galizio, N. O. Non-compaction cardiomyopathy. Risk stratification of Sudden death for automatic cardioverter defibrillator implantation. *REV ARGENT CARDIOL* 2011;**79**:7.
